# Supplementary material for: The ultrafast reactions in the photochromic cycle of water-soluble fulgimide photoswitches
Source: Royal Society of Chemistry journal article supplement (doi:10.1039/c5cp06866e), 2016-01-01
Supplement: c5cp06866e1.pdf [file c5cp06866e1.pdf]

# Supporting information

## The ultrafast reactions in the photochromic cycle of water-soluble fulgimide photoswitches

C. Slavov,<sup>a</sup> C. Boumrifak,<sup>a</sup> C. Hammer,<sup>a</sup> P. Trojanowski,<sup>a</sup> X. Chen,<sup>b</sup> W. J. Lees,<sup>b</sup> J. Wachtveitl,<sup>a</sup> and M. Braun<sup>a,\*</sup>

<sup>a</sup> Institute of Physical and Theoretical Chemistry, Goethe University, Max von Laue-Str. 7, 60438 Frankfurt/Main, Germany.

<sup>b</sup> Biomolecular Sciences Institute, School of Integrated Sciences and Humanities and Department of Chemistry and Biochemistry, Florida International University, Miami, Florida 33199, United States

\*e-mail: [braun@theochem.uni-frankfurt.de](mailto:braun@theochem.uni-frankfurt.de)

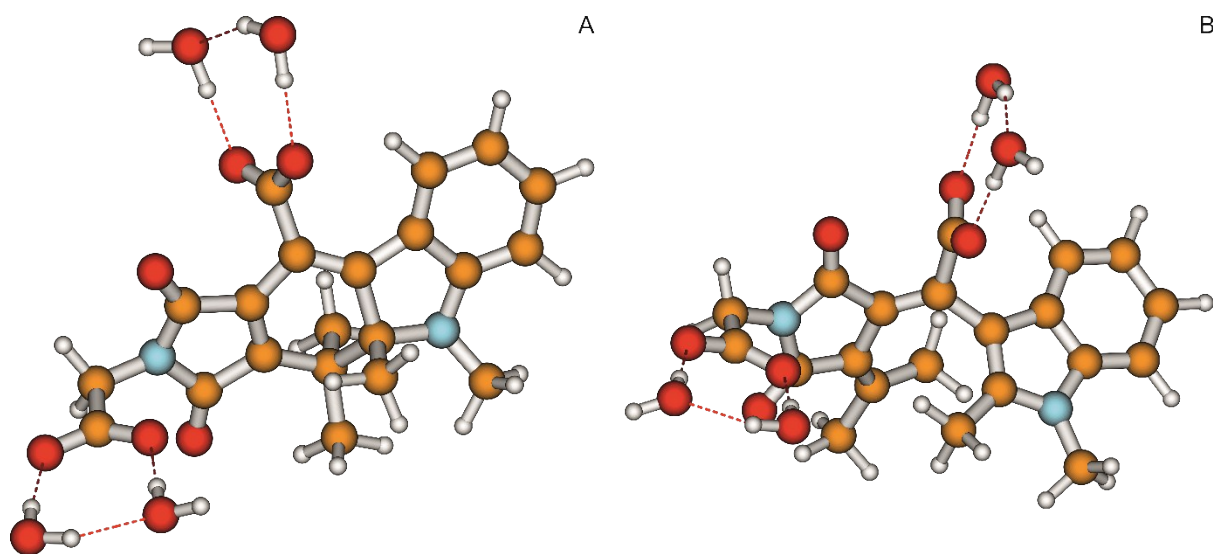

Figure S1. Geometry optimized molecular structures of the investigate C- (A) and Z-form (B) of WF including four explicit molecules. These structure were used for the theoretical calculations.

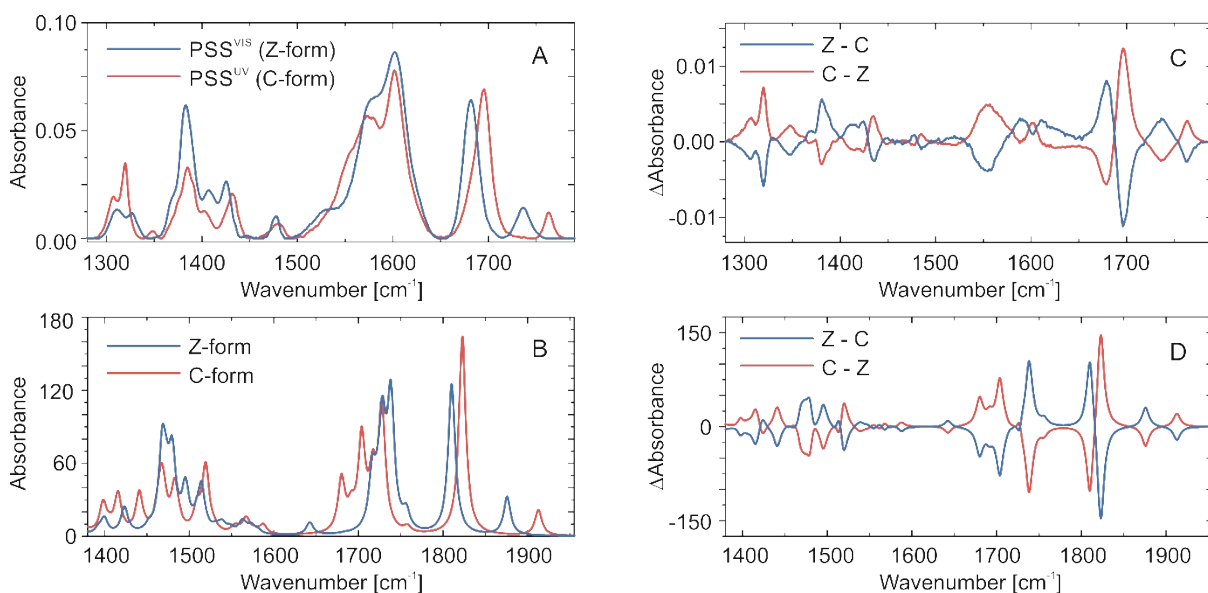

Figure S2. A) Experimental IR absorption spectra of the WF C- and Z-forms dissolved in sodium phosphate buffer (pD 7.4); B) Theoretical IR spectra of the WF C- and Z-forms obtained as described in the manuscript; C) Experimental IR absorption difference spectra resulting from the ring-opening and the ring-closing reaction of WF; D) Theoretical infrared absorption difference spectra of the WF C- and Z-forms obtained as described in the manuscript.

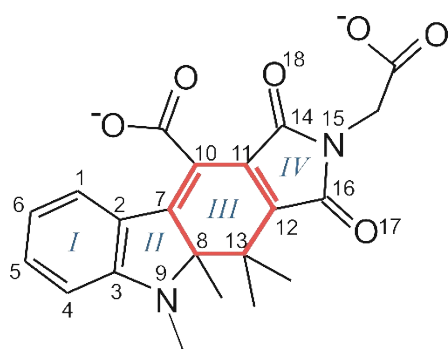

Figure S3. Chemical structure of the C-form of the water-soluble indolyfulgimide (WF).

Table S1. Comparison of the electrostatic properties of the C-form of WF in the relaxed ground ( $S_0$ ) and excited ( $S_1$ ) states. The atoms with largest change in their partial charge are highlighted.

| Atom number | Atom | $S_0$ charge | $S_1$ charge | Difference |
|-------------|------|--------------|--------------|------------|
| 1           | C    | -0.41244     | -0.34648     | 0.065961   |
| 2           | C    | 0.3678       | 0.347493     | -0.02031   |
| 3           | C    | 0.064401     | 0.164811     | 0.10041    |
| 4           | C    | -0.24851     | -0.33023     | -0.08173   |
| 5           | C    | -0.14721     | -0.08828     | 0.058937   |
| 6           | C    | -0.17398     | -0.17822     | -0.00424   |
| 7           | C    | -0.55271     | -0.58271     | -0.03      |
| 8           | C    | 0.577424     | 0.429617     | -0.14781   |
| 9           | N    | -0.25711     | -0.06717     | 0.189941   |
| 10          | C    | 0.124498     | 0.280976     | 0.156478   |
| 11          | C    | -0.2202      | -0.35377     | -0.13357   |
| 12          | C    | -0.36889     | -0.35301     | 0.015877   |
| 13          | C    | 0.600031     | 0.591127     | -0.0089    |
| 14          | C    | 0.711282     | 0.630331     | -0.08095   |
| 15          | N    | -0.34023     | -0.20671     | 0.133524   |
| 16          | C    | 0.715441     | 0.573793     | -0.14165   |
| 17          | O    | -0.55174     | -0.61514     | -0.0634    |
| 18          | O    | -0.55172     | -0.60744     | -0.05573   |
| 19          | C    | -0.33337     | -0.35269     | -0.01932   |
| 20          | C    | 0.831012     | 0.843655     | 0.012643   |
| 21          | O    | -0.79125     | -0.79503     | -0.00378   |
| 22          | C    | -0.50658     | -0.50107     | 0.005515   |
| 23          | C    | -0.58139     | -0.50995     | 0.071447   |
| 24          | C    | -0.53775     | -0.42611     | 0.111643   |
| 25          | C    | 0.757263     | 0.737248     | -0.02002   |
| 26          | O    | -0.74354     | -0.74693     | -0.00339   |
| 27          | C    | -0.30207     | -0.36359     | -0.06152   |
| 28          | O    | -0.78034     | -0.76232     | 0.018023   |
| 29          | O    | -0.71013     | -0.72008     | -0.00995   |
| 30          | H    | 0.117031     | 0.114243     | -0.00279   |
| 31          | H    | 0.114078     | 0.123853     | 0.009775   |
| 32          | H    | 0.123085     | 0.108392     | -0.01469   |
| 33          | H    | 0.129038     | 0.109457     | -0.01958   |
| 34          | H    | 0.117583     | 0.102411     | -0.01517   |
| 35          | H    | 0.155468     | 0.141155     | -0.01431   |
| 36          | H    | 0.176044     | 0.19803      | 0.021986   |
| 37          | H    | 0.161238     | 0.158458     | -0.00278   |

|    |   |          |          |          |
|----|---|----------|----------|----------|
| 38 | H | 0.281199 | 0.238026 | -0.04317 |
| 39 | H | 0.123369 | 0.158316 | 0.034947 |
| 40 | H | 0.136942 | 0.149951 | 0.013009 |
| 41 | H | 0.113836 | 0.148129 | 0.034293 |
| 42 | H | 0.123472 | 0.112258 | -0.01121 |
| 43 | H | 0.129923 | 0.113309 | -0.01661 |
| 44 | H | 0.159484 | 0.128032 | -0.03145 |
| 45 | H | 0.155931 | 0.148377 | -0.00755 |
| 46 | H | 0.151937 | 0.141816 | -0.01012 |
| 47 | H | 0.147575 | 0.159634 | 0.012059 |
| 48 | H | 0.474104 | 0.467454 | -0.00665 |
| 49 | O | -1.0476  | -1.02483 | 0.022765 |
| 50 | H | 0.500617 | 0.48804  | -0.01258 |
| 51 | H | 0.467635 | 0.469703 | 0.002068 |
| 52 | O | -0.97072 | -0.96608 | 0.004646 |
| 53 | H | 0.456057 | 0.458473 | 0.002416 |
| 54 | H | 0.512393 | 0.506947 | -0.00545 |
| 55 | O | -1.07657 | -1.07352 | 0.003046 |
| 56 | H | 0.490676 | 0.488202 | -0.00247 |
| 57 | H | 0.43141  | 0.436449 | 0.005039 |
| 58 | O | -0.95106 | -0.9524  | -0.00133 |
| 59 | H | 0.457813 | 0.455575 | -0.00224 |
